# Supplementary material for: Rapid microwave-assisted synthesis of hybrid zeolitic–imidazolate frameworks with mixed metals and mixed linkers
Source: Royal Society of Chemistry journal article supplement (doi:10.1039/c6ta11170j), 2017-01-01
Supplement: c6ta11170j1.pdf [file c6ta11170j1.pdf]

1 ***Supporting Information***

2 **Rapid Microwave-assisted Synthesis of Hybrid Zeolitic-**  
3 **Imidazolate Frameworks with Mixed Metals and Mixed**  
4 **Linkers**

5 Febrian Hillman,<sup>a</sup> John M. Zimmerman,<sup>a</sup> Seung-Min Paek,<sup>c</sup> Mohamad Rezi Abdul Hamid,<sup>a</sup>  
6 Woo Taik Lim,<sup>d</sup> and Hae-Kwon Jeong<sup>\*a,b</sup>

7 <sup>a</sup>Artie McFerrin Department of Chemical Engineering and <sup>b</sup>Department of Materials Science and  
8 Engineering, Texas A&M University, College Station, TX 77843-3122

9 <sup>c</sup>Department of Chemistry, Kyungpook National University, Taegu 41566, Korea.

10 <sup>d</sup>Department of Applied Chemistry, Andong National University, Andong 36729, Korea.

11 \* Corresponding author: [hjeong7@tamu.edu](mailto:hjeong7@tamu.edu)

12

1 **1. Mixed metal CoZn-ZIF-8**

2 **Table S1.** Neutron Activation Analysis for the mixed metal CoZn-ZIF-8

|                                              | Mol% Co in synthesis solution | Mol% Co incorporated into framework* |
|----------------------------------------------|-------------------------------|--------------------------------------|
| Co <sub>0.20</sub> Zn <sub>0.80</sub> -ZIF-8 | 20 mol%                       | 18 mol%                              |
| Co <sub>0.33</sub> Zn <sub>0.67</sub> -ZIF-8 | 33 mol%                       | 30 mol%                              |
| Co <sub>0.50</sub> Zn <sub>0.50</sub> -ZIF-8 | 50 mol%                       | 45 mol%                              |
| Co <sub>0.67</sub> Zn <sub>0.33</sub> -ZIF-8 | 67 mol%                       | 64 mol%                              |
| Co <sub>0.80</sub> Zn <sub>0.20</sub> -ZIF-8 | 80 mol%                       | 79 mol%                              |

3 \*with respect to total metal

4

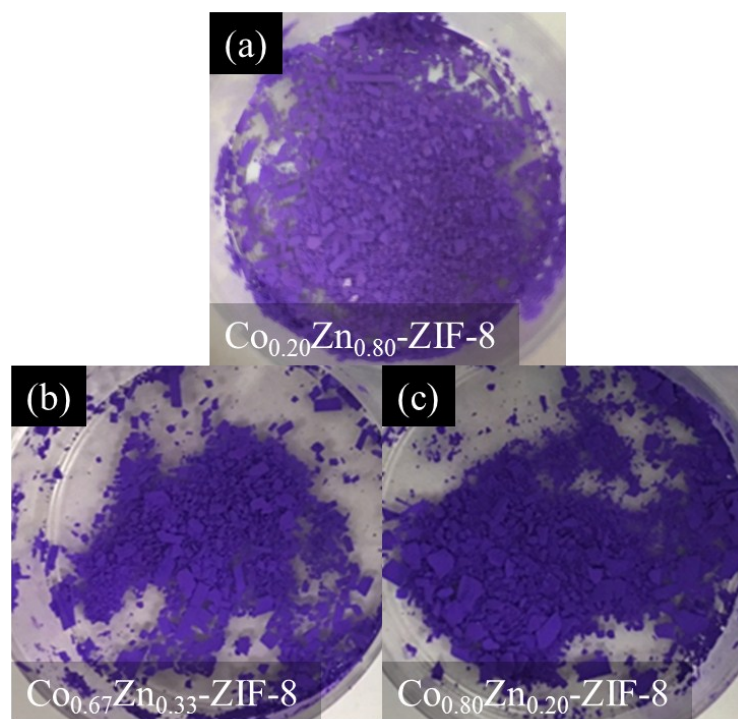

5

6 **Figure S1.** Photographs of (a)  $\text{Co}_{0.20}\text{Zn}_{0.80}\text{-ZIF-8}$ , (b)  $\text{Co}_{0.67}\text{Zn}_{0.33}\text{-ZIF-8}$ , (c)  $\text{Co}_{0.80}\text{Zn}_{0.20}\text{-ZIF-8}$ .

7

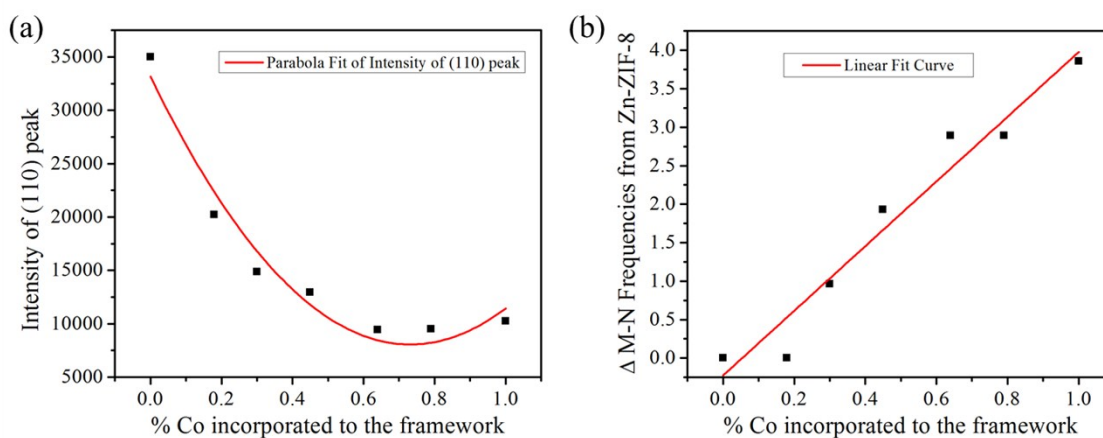

1

2 **Figure S2.** Relationship between % Co incorporated to the framework with (a) intensity of  
 3 (110) peak, and (b) M-N stretching frequencies blue shift from the pure Zn-ZIF-8.

4

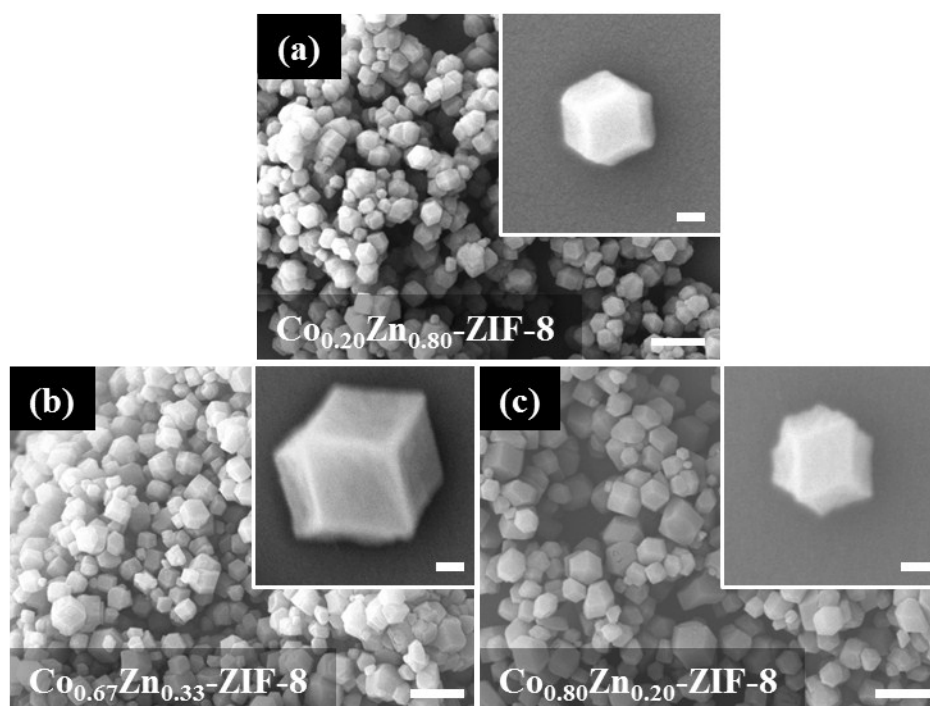

5

6 **Figure S3.** Scanning electron microscopy (SEM) images of (a)  $\text{Co}_{0.20}\text{Zn}_{0.80}\text{-ZIF-8}$ , (b)  
 7  $\text{Co}_{0.67}\text{Zn}_{0.33}\text{-ZIF-8}$ , (c)  $\text{Co}_{0.80}\text{Zn}_{0.20}\text{-ZIF-8}$ . All scale inside the white box is 100 nm, and outside white box  
 8 is 1  $\mu\text{m}$

9

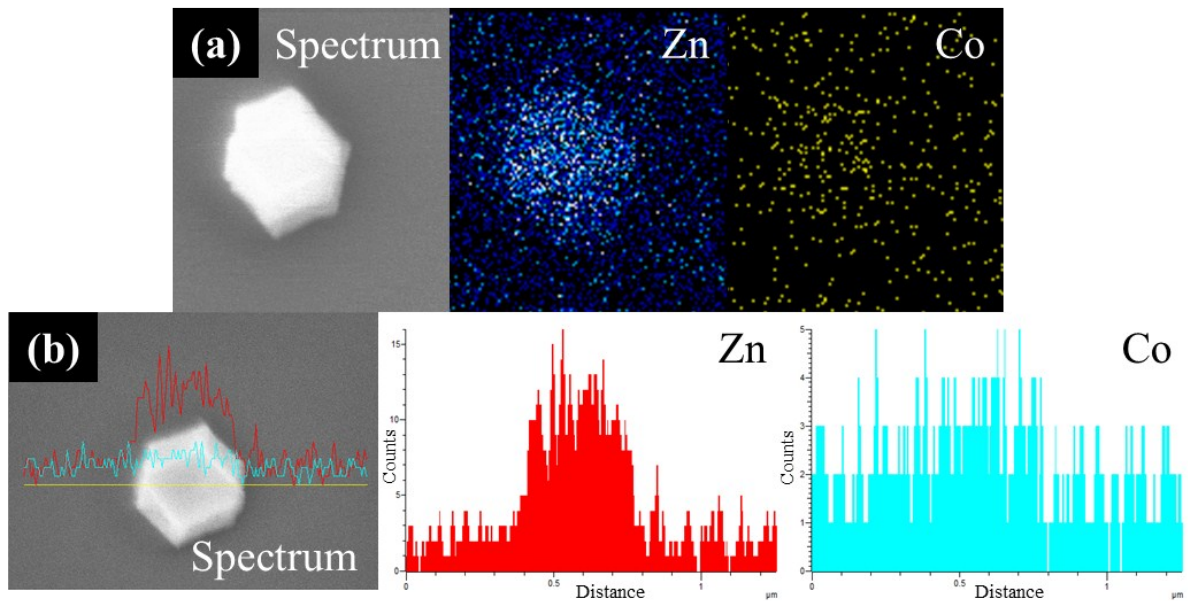

1

2 **Figure S4.** SEM-EDS profile for  $\text{Co}_{0.20}\text{Zn}_{0.80}$ -ZIF-8 crystal using (a) elemental mapping  
 3 method, and (b) line scanning method where yellow line in the SEM picture indicate the EDS  
 4 analysis area.

5

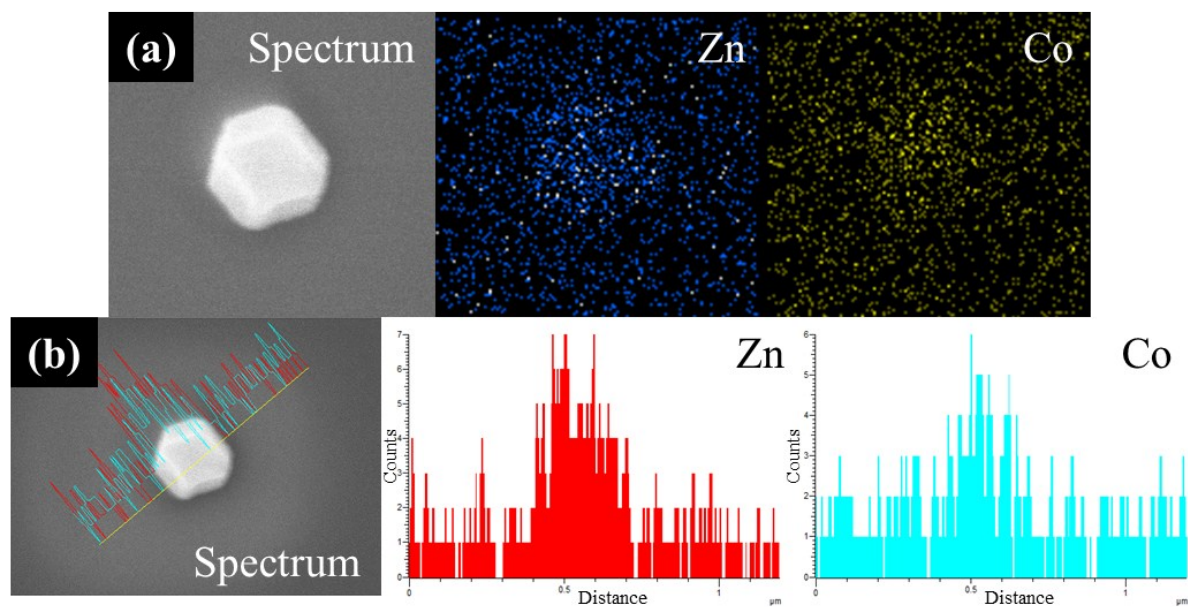

6

7 **Figure S5.** SEM-EDS profile for  $\text{Co}_{0.33}\text{Zn}_{0.67}$ -ZIF-8 crystal using (a) elemental mapping  
 8 method, and (b) line scanning method where yellow line in the SEM picture indicate the EDS  
 9 analysis area.

10



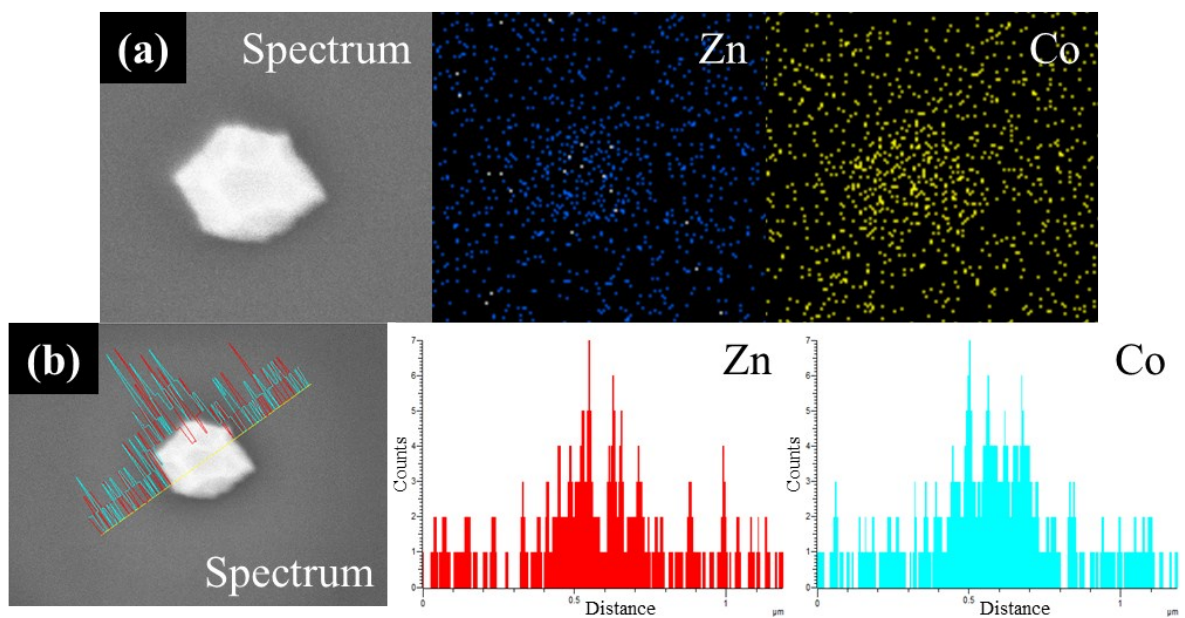

1

2 **Figure S6.** SEM-EDS profile for  $\text{Co}_{0.67}\text{Zn}_{0.33}$ -ZIF-8 crystal using (a) elemental mapping  
 3 method, and (b) line scanning method where yellow line in the SEM picture indicate the EDS  
 4 analysis area.

5

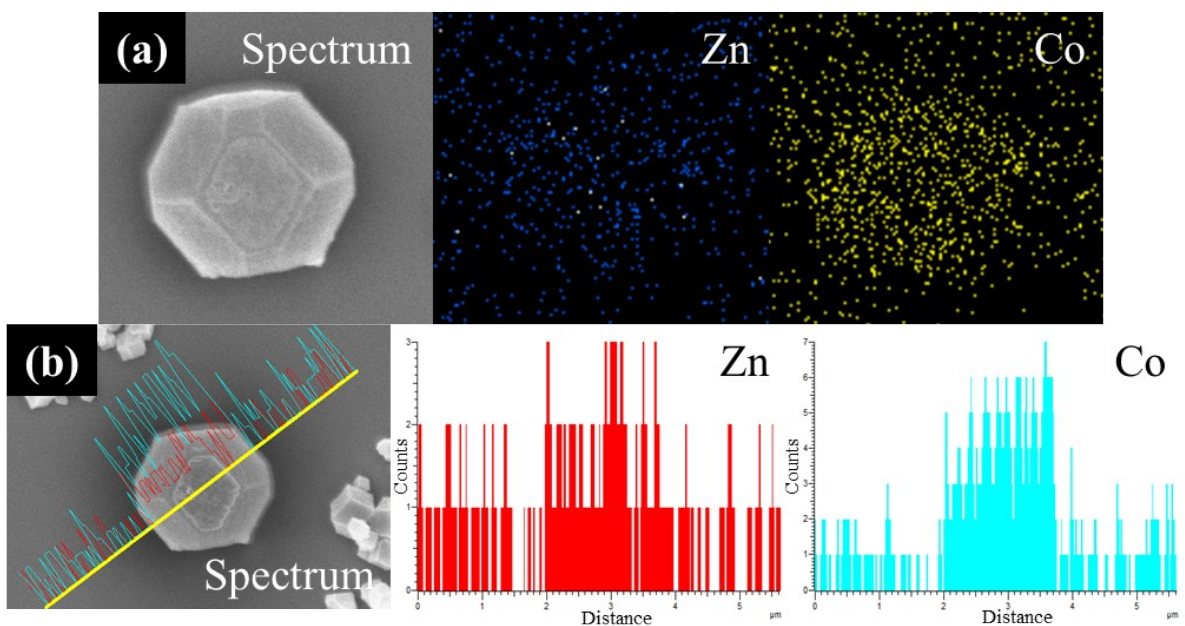

6

7 **Figure S7.** SEM-EDS profile for  $\text{Co}_{0.80}\text{Zn}_{0.20}$ -ZIF-8 crystal using (a) elemental mapping  
 8 method, and (b) line scanning method where yellow line in the SEM picture indicate the EDS  
 9 analysis area.

10

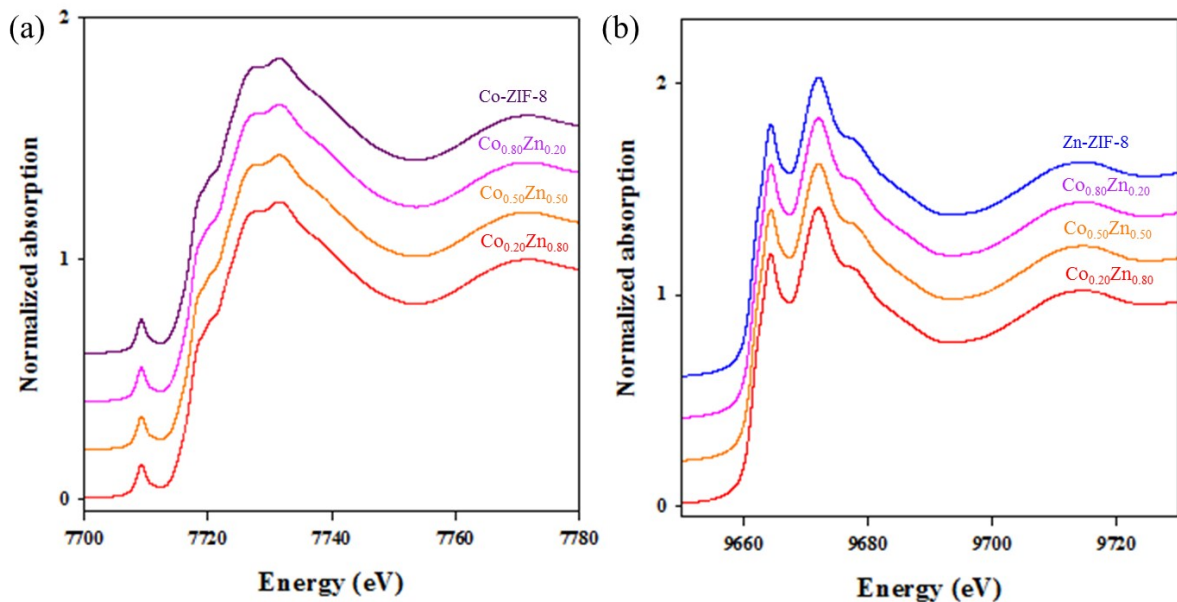

1

2 **Figure S8.** (a) Co K-edge XANES spectra for Co-ZIF-8 and CoZn-ZIF-8; (b) Zn K-edge XANES  
 3 spectra for Zn-ZIF-8 and CoZn-ZIF-8.

4

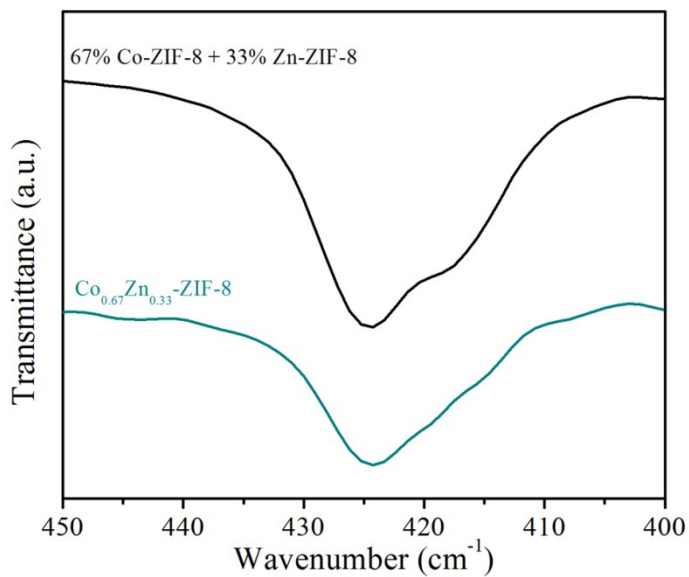

5

6 **Figure S9.** FT-IR spectra comparing M-N stretching vibration from hybrid CoZn-ZIF-8 and  
 7 physical mixture of Co-ZIF-8 and Zn-ZIF-8.

8

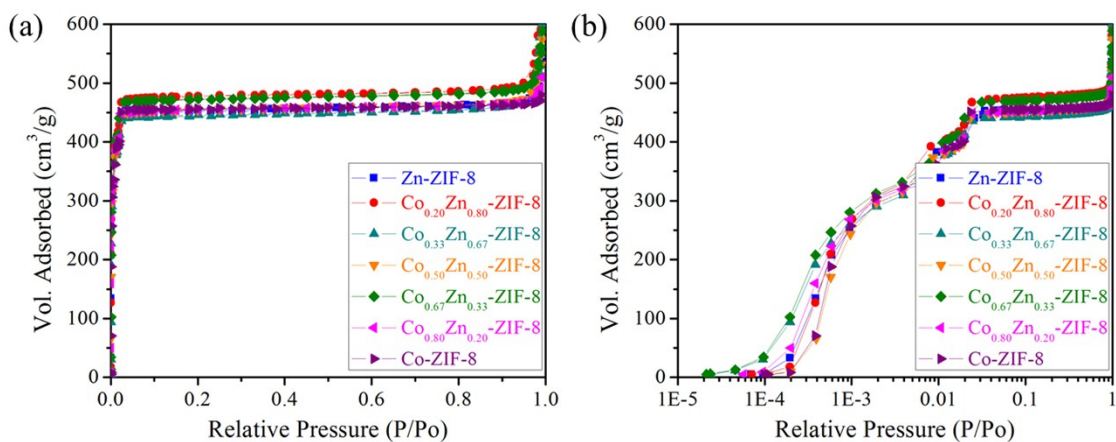

1

2 **Figure S10.** Nitrogen physisorption isotherm of CoZnZIF-8 with various Co/Zn content at 77 K (a)  
 3 with the linear scale x-axis, and (b) with the log scale x-axis.

4

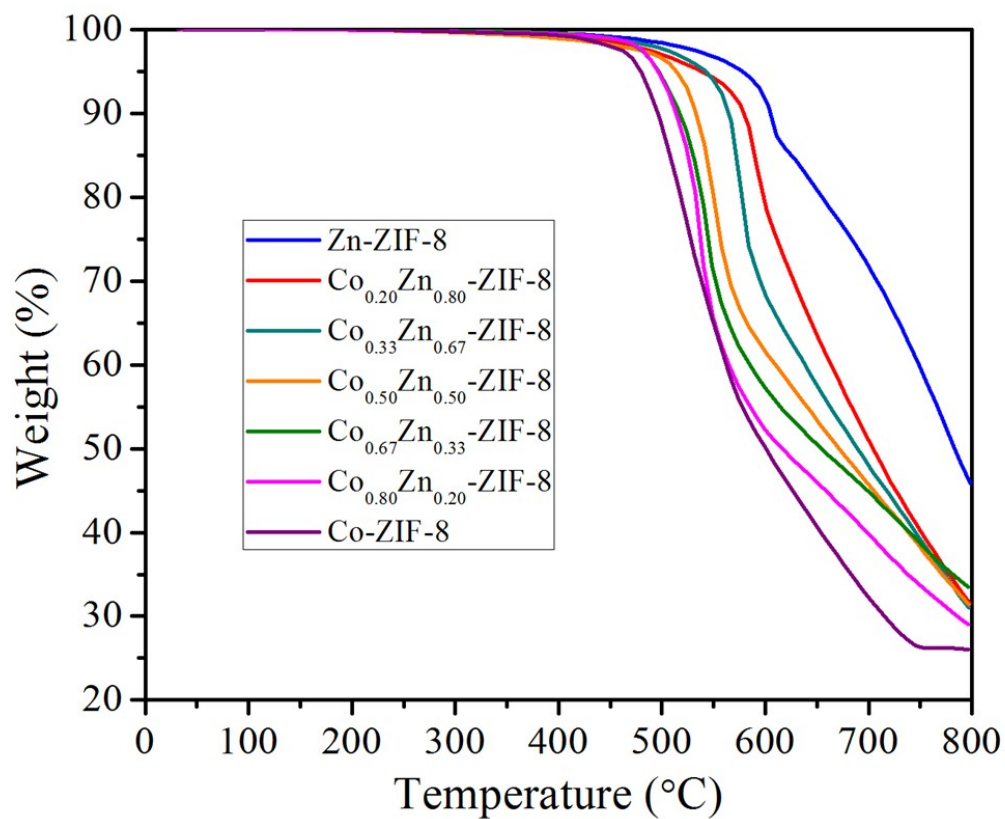

5

6 **Figure S11.** Thermogravimetric analysis on mixed metal CoZn-ZIF-8 with various ratios of Co to Zn.

1

2 **Table S2.** Comparison of micropore volume and BET surface area of mixed metal CoZn-ZIF-8

|                                              | <b>Micropore Volume<br/>(cm<sup>3</sup>/g)</b> | <b>Surface Area<br/>(m<sup>2</sup>/g)*</b> |
|----------------------------------------------|------------------------------------------------|--------------------------------------------|
| Zn-ZIF-8                                     | 0.688                                          | 1202.3                                     |
| Co <sub>0.20</sub> Zn <sub>0.80</sub> -ZIF-8 | 0.716                                          | 1295.2                                     |
| Co <sub>0.33</sub> Zn <sub>0.67</sub> -ZIF-8 | 0.667                                          | 1207.8                                     |
| Co <sub>0.50</sub> Zn <sub>0.50</sub> -ZIF-8 | 0.681                                          | 1232.6                                     |
| Co <sub>0.67</sub> Zn <sub>0.33</sub> -ZIF-8 | 0.711                                          | 1281.3                                     |
| Co <sub>0.80</sub> Zn <sub>0.20</sub> -ZIF-8 | 0.684                                          | 1231.1                                     |
| Co-ZIF-8                                     | 0.694                                          | 1235.0                                     |

3 \*BET surface area

4

5



1 **2. Mixed Ligand ZIF-7-8**

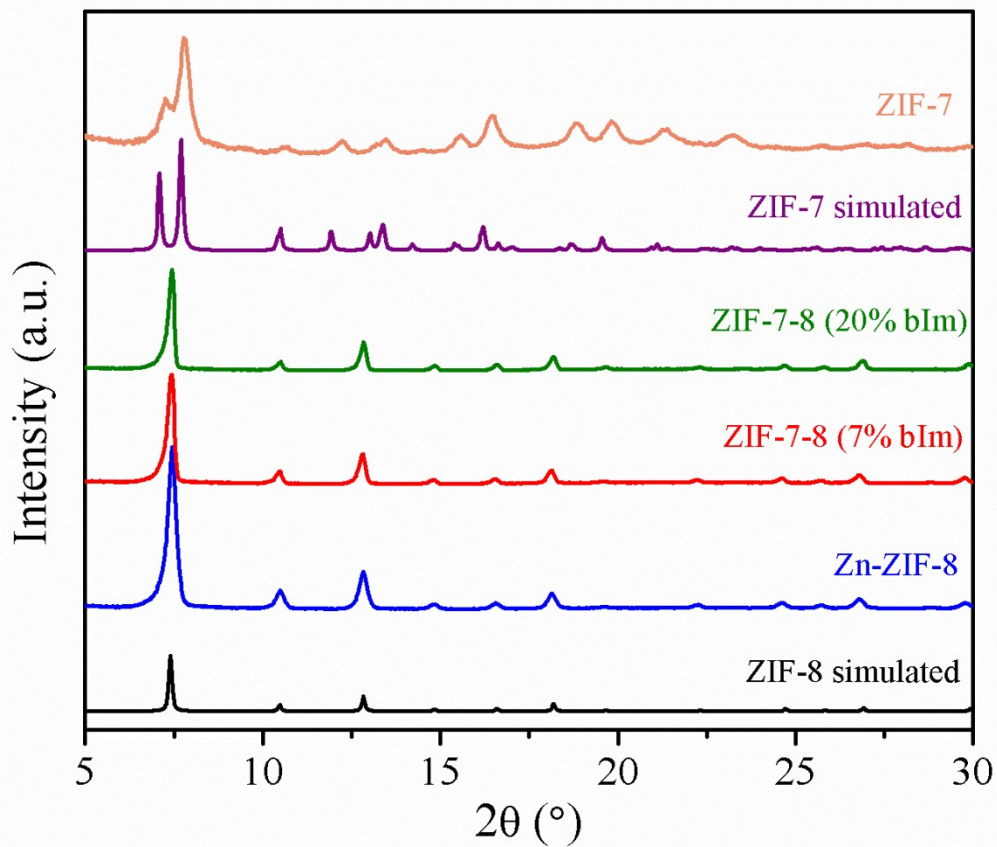

2

3 **Figure S12.** Powder x-ray diffraction (PXRD) pattern of ZIF-7-8 with various amount of benzimidazole  
4 incorporation.

5

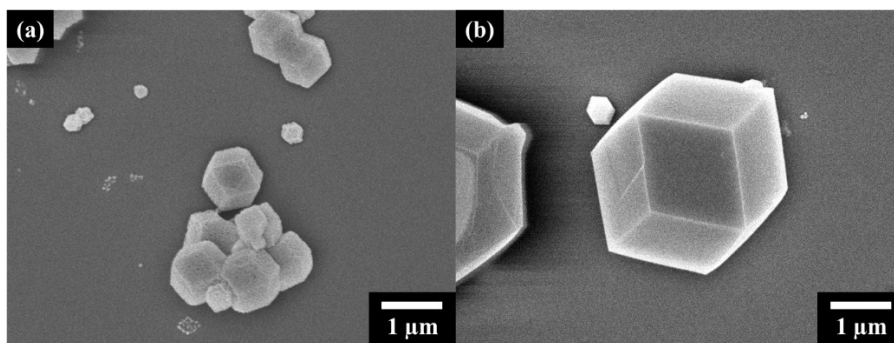

6

7 **Figure S13.** SEM images of ZIF-7-8 with (a) 7% bIm incorporation, (b) 20% bIm incorporation.

8

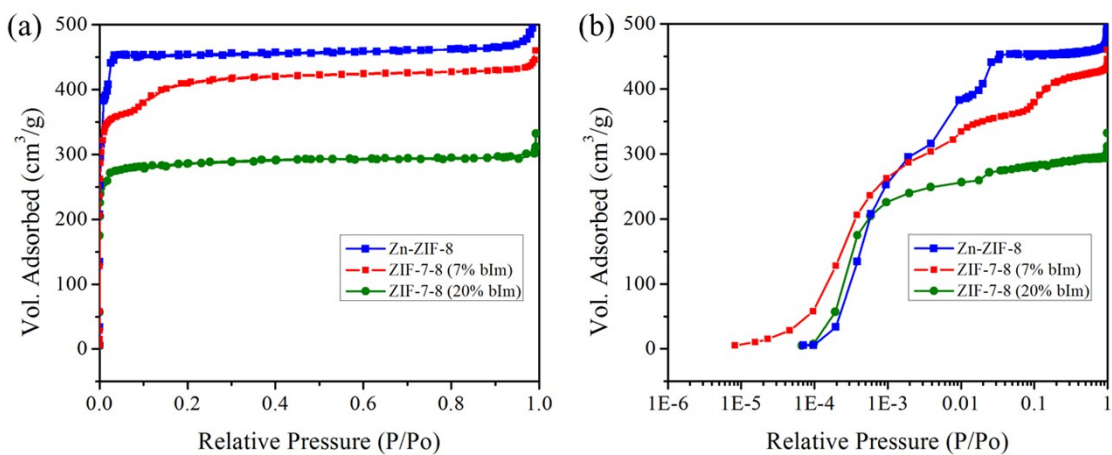

1

2 **Figure S14.** Nitrogen physisorption isotherm of ZIF-7-8 with various bIm content at 77 K (a) with linear  
 3 scale x-axis, and (b) with log scale x-axis.

4

5

### 1 3. Mixed Metal and Ligand CoZn-ZIF-7-8

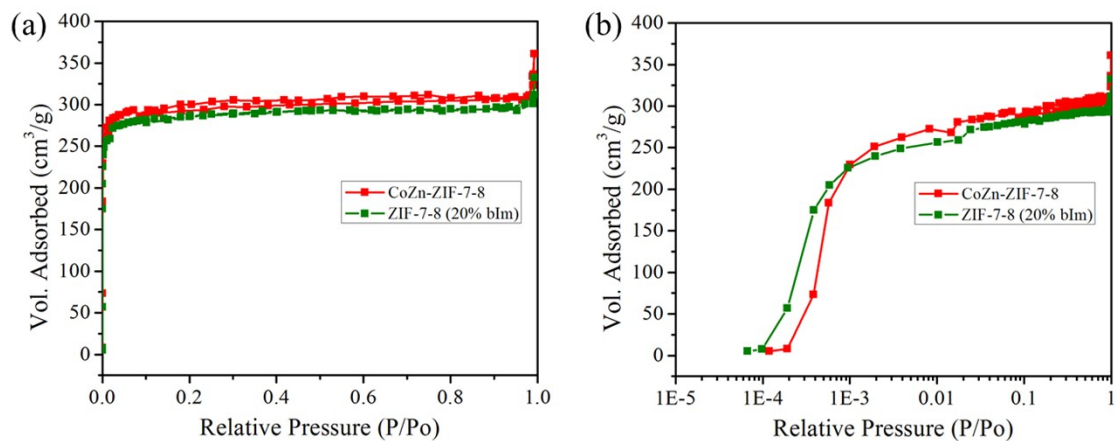

2

3 **Figure S15.** Comparison of nitrogen physisorption on mixed metal and ligand CoZn-ZIF-7-8  
4 (Co to Zn ratio of 1 and 20% bIm) with ZIF-7-8 (20% bIm) (a) with linear scale x-axis, and  
5 (b) with log scale x-axis.

6

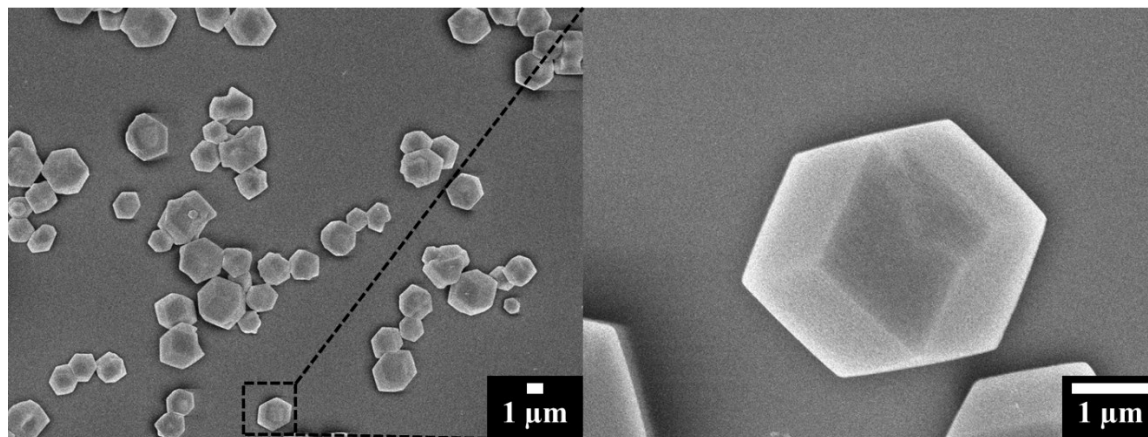

7

8 **Figure S16.** SEM image of mixed metal and ligand CoZn-ZIF-7-8.

9

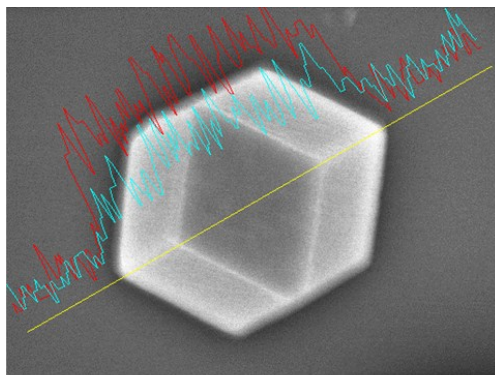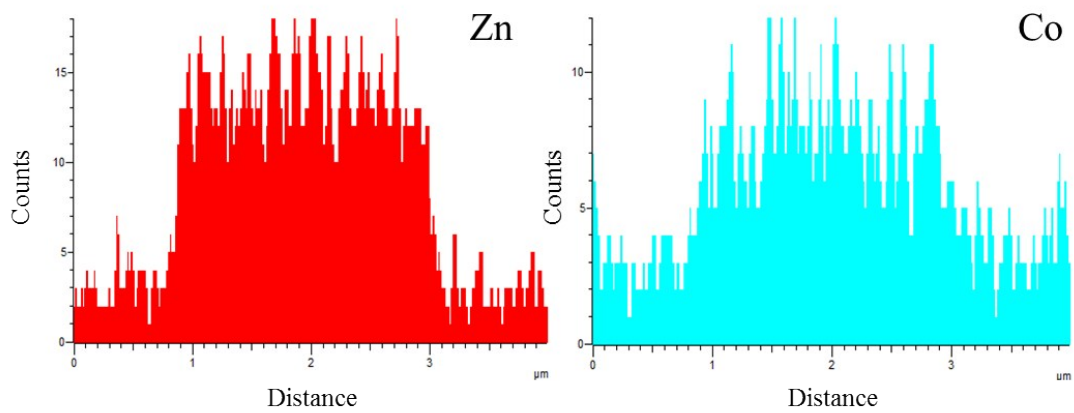

1

2 **Figure S17.** SEM-EDS line scanning of CoZn-ZIF-7-8 (Co to Zn ratio of 1 and 20% bIm).

3

#### 1 4. CoZn-ZIF-8 Membrane

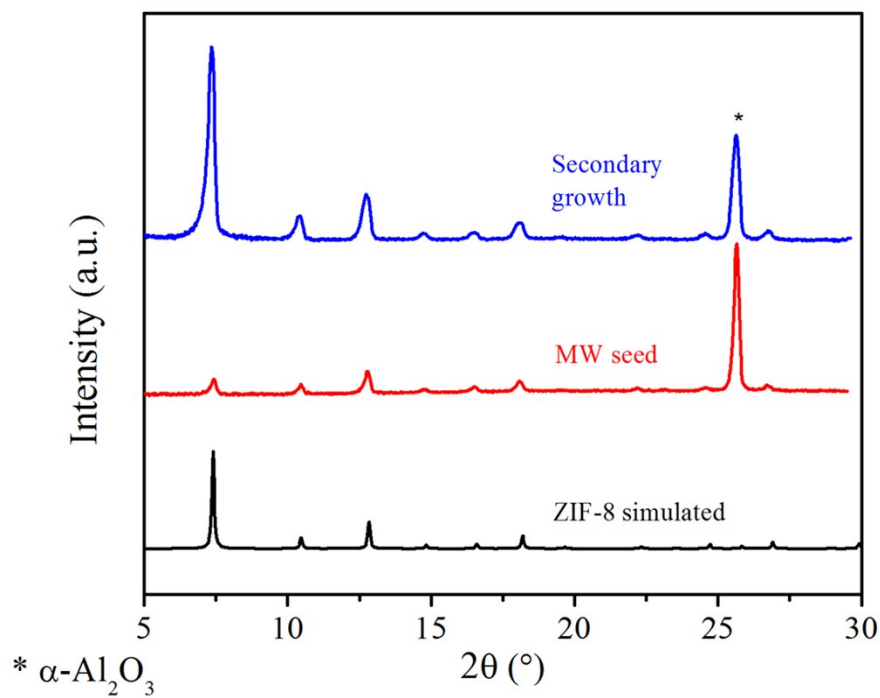

2

3 **Figure S18.** Powder x-ray diffraction (PXRD) pattern of  $\text{Co}_{0.50}\text{Zn}_{0.50}$ -ZIF-8 membrane with  
4 microwave seeding and after secondary growth.

5

6

7

8

9

10



(a) CoZn-ZIF-8 Membrane

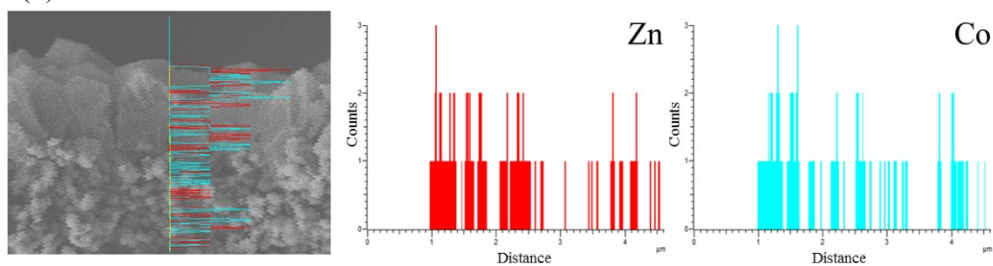

(b) Zn-ZIF-8 Membrane

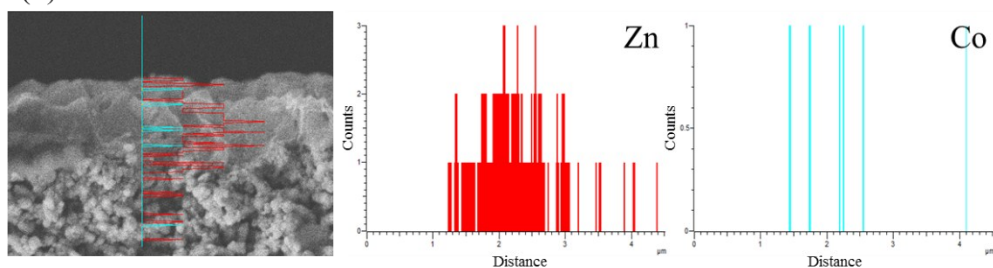

1

2 **Figure S19.** SEM-EDS line scanning of (a)  $\text{Co}_{0.50}\text{Zn}_{0.50}$ -ZIF-8 membrane, and (b) Zn-ZIF-8  
3 membrane for element Zn and Co.
